# Supplementary material
Source: Springer Nature journal article supplement (https://www.springermedizin.de/resource/supplementary/12916_2013_866_MOESM2_ESM.pdf/9598522)
Supplement: MOESM2 [file 9598522]

**1446 ADRs**

6,601 admissions/5,118 patients

151 admissions without drug exposure

129 ADRs with identical start date  
(>1 ADR/day during same admission = 1 ADR event)

PICU from day 1 => censored from day 1  
356 admissions; 43 ADRs  
PICU after day 1 => censored from time of PICU admission  
117 ADRs

**1,157 ADRs**

6,094 admissions/4,724 patients

769 patients with >1 admission  
318 ADRs 'multi admissions'

118 patients had a total >1 ADRs during first admission  
145 ADRs = 'multi event' during first admission

**694 ADRs**

694 patients with at least one ADR  
4,030 patients without ADR

**Univariate and multivariate  
analysis**
